# Supplementary material
Source: MDPI journal article supplement (https://www.mdpi.com/2071-1050/8/1/11)
Supplement: s1 [file s1]

# Supplementary Materials: A Life Cycle Assessment of Silica Sand: Comparing the Beneficiation Processes

Anamarija Grbeš

Table S1. SIEVING, WASHING, SIZING OF THE RAW SILICA SAND

| UNIT | INPUT                                 | Unit    | Amount     | FROM          |
|------|---------------------------------------|---------|------------|---------------|
| A-1  | 1. Raw silica sand                    | t/year  | 150,000.00 | technosphere  |
|      | 2. Diesel                             | t/year  | 13.6       | technosphere  |
|      | 3. Hydraulic oil                      | t/year  | 1          | technosphere  |
|      | 4. Motor oil                          | t/year  | 1          | technosphere  |
|      | 5. Grease                             | t/year  | 0.15       | technosphere  |
|      | 6. Tyres                              | t/year  | 0.219      | technosphere  |
|      | OUTPUT                                | Unit    | Amount     | IN            |
|      | 1. Raw silica sand                    | t/year  | 150,000.00 | Proces 2      |
|      | 2. Internal combustion motor-emission |         | x          | nature (air)  |
|      | 3. Hydrocarbons emission              |         | x          | nature (soil) |
| A-2  | 4. Noise                              |         | x          | nature (air)  |
|      | 5. Waste for treatment (Tyres)        | t/year  | 0.219      | technosphere  |
|      | INPUT                                 | Unit    | Amount     | FROM          |
|      | 1. Raw silica sand                    | t/year  | 150,000.00 | process A-1   |
|      | 2. Electricity                        | kWh/god | 14,150.00  | technosphere  |
|      | OUTPUT                                | Unit    | Amount     | IN            |
|      | 1. Raw silica sand                    | t/year  | 150,000.00 | process A-3   |
|      | INPUT                                 | Unit    | Amount     | FROM          |
|      | 1. Raw silica sand                    | t/year  | 150,000.00 | process A-2   |
|      | 2. Electricity                        | kWh/god | 21,225.00  | technosphere  |
| A-3  | OUTPUT                                | Unit    | Amount     | IN            |
|      | 1. Raw silica sand                    | t/year  | 150,000.00 | process A-4   |
|      | INPUT                                 | Unit    | Amount     | FROM          |
|      | 1. Raw silica sand                    | t/year  | 150,000.00 | process A-3   |
|      | 2. Electricity                        | kWh/god | 31,413.00  | technosphere  |
|      | OUTPUT                                | Unit    | Amount     | IN            |
|      | 1. Passing P1 (95%)                   | t/year  | 142,500.00 | process A-5   |
|      | 2. Rejected O1 (5%)                   | t/year  | 7500.00    | process A-8   |
|      | INPUT                                 | Unit    | Amount     | FROM          |
|      | 1. Passing P1 vibratory sieve         | t/year  | 142,500.00 | process A-4   |
| A-4  | 2. Water                              | t/year  | 490,833.33 | from nature   |
|      | 3. Electricity                        | kWh     | 79,000.00  | technosphere  |
|      | OUTPUT                                | Unit    | Amount     | IN            |
|      | 1. Suspension S1                      | t/year  | 633,333.33 | process A-6   |
|      | 1.1. P1, suspended S1, 22%            | t/year  | 142,500.00 |               |
|      | 1.2. Water in suspension S1           | t/year  | 490,833.33 |               |
|      | INPUT                                 | Unit    | Amount     | FROM          |
|      | 1. Suspension S1                      | t/year  | 633,333.33 | process A-5   |
|      | 1.1. P1, suspended S1, 22.5%          | t/year  | 142,500.00 |               |
|      | 1.2. Water in suspension S1, 87.5%    | t/year  | 490,833.33 |               |
| A-5  | 2. Electricity                        | kWh/god | 9796.88    | technosphere  |
|      | OUTPUT                                | Unit    | Amount     | IN            |
|      | 1. Suspension S2                      | t/year  | 633,333.33 | process A-7   |
|      | 1.1. P1, suspended S1, 22%            | t/year  | 142,500.00 |               |
|      | 1.2. Water in suspension S2           | t/year  | 490,833.33 |               |
|      | INPUT                                 | Unit    | Amount     | FROM          |
|      | 1. Suspension S2                      | t/year  | 633,333.33 | process A-6   |
|      | 1.1. P1, suspended S1, 22%            | t/year  | 142,500.00 |               |
|      | 1.2. Water in suspension S2           | t/year  | 490,833.33 |               |
|      | INPUT                                 | Unit    | Amount     | FROM          |
| A-6  | 1. Suspension S2                      | t/year  | 633,333.33 | process A-6   |
|      | 1.1. P1, suspended S1, 22%            | t/year  | 142,500.00 |               |

|      |      |                                          |         |            |              |
|------|------|------------------------------------------|---------|------------|--------------|
| A-8  | 1.2. | Water in suspension S2                   | t/year  | 490,833.33 |              |
|      | 2.   | Electricity                              | kWh/god | 10,555.90  | technosphere |
|      |      | OUTPUT                                   | Unit    | Amount     | IN           |
|      | 1.   | Rejected O2                              | t/year  | 18,750.00  | process A-8  |
|      | 1.1. | Minerals in O2, class +0.8mm (80%)       | t/year  | 15,000.00  |              |
|      | 1.2. | Water in Rejected O2 (20%)               | t/year  | 3750.00    |              |
|      | 2.   | Suspension S3 (20% solids)               | t/year  | 614,583.33 | process A-9  |
|      | 2.1. | Passing P2 (-0.8mm), suspended S3 (20%)  | t/year  | 127,500.00 |              |
|      | 2.2. | Water in suspension S3 (80%)             | t/year  | 487,083.33 |              |
|      |      | INPUT                                    | Unit    | Amount     | FROM         |
|      | 1.   | Rejected O1                              | t/year  | 7500.00    | process A-4  |
|      | 2.   | Rejected O2 (+0.8mm)                     | t/year  | 18,750.00  | process A-7  |
|      | 2.1. | Minerals u O2                            | t/year  | 15,000.00  |              |
|      | 2.2. | Water in Rejected O2 (20%)               | t/year  | 3750.00    |              |
| A-9  | 3.   | Electricity                              | kWh/god | 21,225.00  | technosphere |
|      |      | OUTPUT                                   | Unit    | Amount     | IN           |
|      | 1.   | Temporary disposed oversize              | t/year  | 26,250.00  | technosphere |
|      | 1.1. | Minerals O1+O2                           | t/year  | 22,500.00  |              |
|      | 1.2. | Water in Rejected O2                     | t/year  | 3750.00    |              |
|      |      | INPUT                                    | Unit    | Amount     | FROM         |
|      | 1.   | Suspension S3 (20% solids)               | t/year  | 614,583.33 | process A-7  |
|      | 1.1. | Passing P2 (-0,8mm), suspended S3 (20%)  | t/year  | 127,500.00 |              |
|      | 1.2. | Water in suspension S3 (80%)             | t/year  | 487,083.33 |              |
|      | 2.   | Electricity                              | kWh/god | 70,750.00  | technosphere |
|      |      | OUTPUT                                   | Unit    | Amount     | IN           |
|      | 1.   | Suspension S4                            | t/year  | 460,297.62 | process A-10 |
|      | 1.1. | Class 0.1mm, suspended                   | t/year  | 19,500.00  |              |
|      | 1.2. | Water, suspended S4                      | t/year  | 440,797.62 |              |
| A-10 | 2.   | Pulp S5 (70%solids 0.8/0.1 mm)           | t/year  | 154,285.71 | process A-11 |
|      | 2.1. | Water, in pulp S5                        | t/year  | 46,285.71  |              |
|      | 2.2. | Minerals, class 0.8/0.1 in pulp (70%)    | t/year  | 108,000.00 |              |
|      |      | INPUT                                    | Unit    | Amount     | FROM         |
|      | 1.   | Suspension S4                            | t/year  | 460,297.62 | process A-9  |
|      | 1.1. | Class 0.1mm, suspended                   | t/year  | 19,500.00  |              |
|      | 1.2. | Water, suspended S4                      | t/year  | 440,797.62 |              |
|      |      | OUTPUT                                   | Unit    | Amount     | IN           |
|      | 1.   | Class 0.1mm, sedimented                  | t/year  | 19,500.00  | nature       |
|      | 2.   | Water                                    | t/year  | 440,797.62 | nature       |
|      |      | INPUT                                    | Unit    | Amount     | FROM         |
|      | 1.   | Pulp S5 (70%solids 0.8/0.1 mm)           | t/year  | 154,285.71 | process A-9  |
|      | 1.1. | Minerals, class 0.8/0.1 in pulp (70%)    | t/year  | 108,000.00 |              |
|      | 1.2. | Water in pulp S5 (30%)                   | t/year  | 46,285.71  |              |
| A-11 | 2.   | Electricity                              | kWh/god | 84,900.00  | technosphere |
|      |      | OUTPUT                                   | Unit    | Amount     | IN           |
|      | 1.   | Pulp S5 (70%solids 0.8/0.1 mm), attrited | t/year  | 154,285.71 | process A-12 |
|      | 1.1. | Minerals, class 0.8/0.1 in pulp          | t/year  | 107,430.00 |              |
|      | 1.2. | Minerals, class -0.1 mm (liberated)      | t/year  | 570        |              |
|      | 1.3. | Water in pulp S5 (30%)                   | t/year  | 46,285.71  |              |
|      |      | INPUT                                    | Unit    | Amount     | FROM         |
|      | 1.   | Pulp S5 (70%solids 0.8/0.1 mm), attrited | t/year  | 154,285.71 | process A-11 |
|      | 1.1. | Minerals, class 0.8/0.1 in pulp          | t/year  | 107,430.00 |              |
|      | 1.2. | Minerals, class -0.1 mm (liberated)      | t/year  | 570        |              |
|      | 1.3. | Water in pulp S5 (30%)                   | t/year  | 46,285.71  |              |
|      | 2.   | Water for sizing                         | t/year  | 114,000.00 | technosphere |
|      |      | OUTPUT                                   | Unit    | Amount     | IN           |
|      | 1.   | Overflow S6 (1.1% solids)                | t/year  | 53,425.71  | process A-13 |
| A-12 |      |                                          |         |            |              |
|      |      |                                          |         |            |              |
|      |      |                                          |         |            |              |
|      |      |                                          |         |            |              |
|      |      |                                          |         |            |              |
|      |      |                                          |         |            |              |
|      |      |                                          |         |            |              |
|      |      |                                          |         |            |              |
|      |      |                                          |         |            |              |
|      |      |                                          |         |            |              |
|      |      |                                          |         |            |              |
|      |      |                                          |         |            |              |
|      |      |                                          |         |            |              |
|      |      |                                          |         |            |              |
|      |      |                                          |         |            |              |

|      |      |                                             |         |            |                            |
|------|------|---------------------------------------------|---------|------------|----------------------------|
| A-13 | 1.1. | Water                                       | t/year  | 52,855.71  |                            |
|      | 1.2. | Organics (0.38%)                            | t/year  | 2,174      |                            |
|      | 1.3. | Minerals, class -0,1 mm                     | t/year  | 567,826    |                            |
|      | 2.   | Overflow S7 (50% solids)                    | t/year  | 214,860.00 | process A-14               |
|      | 2.1. | Water                                       |         | 107,430.00 |                            |
|      | 2.2. | Minerals class 0.8/0.1 mm                   |         | 107,430.00 |                            |
|      |      | INPUT                                       | Unit    | Amount     | FROM                       |
|      | 1.   | Suspension S6                               | t/year  | 53,425.71  | process A-12               |
|      | 1.1. | Class -0.1mm, suspended                     | t/year  | 570        |                            |
|      | 1.2. | Water, suspended S6                         | t/year  | 52,855.71  |                            |
| A-14 |      | OUTPUT                                      | Unit    | Amount     | IN                         |
|      | 1.   | Class 0.1mm, sediment                       | t/year  | 570        | nature                     |
|      | 2.   | Water                                       | t/year  | 52,855.71  | nature                     |
|      |      | INPUT                                       | Unit    | Amount     | FROM                       |
|      | 1.   | Overflow S7                                 | t/year  | 214,860.00 | process A-12               |
|      | 1.1. | Water                                       | t/year  | 107,430.00 |                            |
|      | 1.2. | Minerals class 0.8/0.1 mm                   | t/year  | 107,430.00 |                            |
|      |      | OUTPUT                                      | Unit    | Amount     | IN                         |
|      | 1.   | Rejected O3 (80% solids)                    | t/year  | 134,287.50 | process A-15               |
|      | 1.1. | Water                                       | t/year  | 26,857.50  |                            |
| A-15 | 1.2. | Minerals class 0.8/0.1 mm                   | t/year  | 107,430.00 |                            |
|      | 2.   | Passing P3                                  | t/year  | 80,572.50  | process A-9                |
|      |      | INPUT                                       | Unit    | Amount     | FROM                       |
|      | 1.   | Rejected O3 (80% solids)                    | t/year  | 134,287.50 | process A-14               |
|      | 1.1. | Water                                       | t/year  | 26,857.50  |                            |
|      | 1.2. | Minerals class 0.8/0.1 mm                   | t/year  | 107,430.00 |                            |
|      | 2.   | Electricity                                 | kWh/god | 39,000.00  | technosphere               |
|      |      | OUTPUT                                      | Unit    | Amount     | IN                         |
|      | 1.   | Washed sand, w < 6%, class 0.8/0.1 mm       | t/year  | 114,287.23 | technosphere               |
|      | 1.1. | Washed sand, solids, class 0.8/0.1 mm       | t/year  | 107,430.00 |                            |
|      | 1.2. | Water in washed sand (6%)                   | t/year  | 6857.23    |                            |
|      | 2.   | Water-drained 60%                           | t/year  | 12,000.16  | nature (underground water) |
|      | 3.   | Water loss (evaporation, soil retention)40% | t/year  | 8000.11    | nature (air)               |
|      |      |                                             |         |            |                            |

**Table S2. ELECTROSTATIC CONCENTRATION.**

| UNIT |      | INPUT                                 | Unit     | Amount     | FROM              |
|------|------|---------------------------------------|----------|------------|-------------------|
| B-1  | 1.   | Washed sand, w<6%, class 0.8/0.1 mm   | t/year   | 114,287.23 | process A-15      |
|      | 1.1. | Washed sand, solids, class 0.8/0.1 mm | t/year   | 107,430.00 |                   |
|      | 1.2. | Water in washed sand (6%)             | t/year   | 6857.23    |                   |
|      | 2.   | Electricity                           | kWh/year | 76,200.00  | from technosphere |
|      |      | OUTPUT                                | Unit     | Amount     | IN                |
|      | 1.   | Washed sand, w < 6%, class 0.8/0.1 mm | t/year   | 114,287.23 | process B-2       |
|      | 1.1. | Washed sand, solids, class 0.8/0.1 mm | t/year   | 107,430.00 |                   |
|      | 1.2. | Water in washed sand (6%)             | t/year   | 6857.23    |                   |
|      |      | INPUT                                 | Unit     | Amount     | FROM              |
|      | 1.   | Washed sand, w < 6%, class 0.8/0.1 mm | t/year   | 114,287.23 | process B-1       |
| B-2  | 1.1. | Washed sand, solids, class 0.8/0.1 mm | t/year   | 107,430.00 |                   |
|      | 1.2. | Water in washed sand (6%)             | t/year   | 6857.23    |                   |
|      | 3.   | Electricity                           | kWh/year | 14,150.00  | technosphere      |

|     |        |                                                                         |          |            |              |
|-----|--------|-------------------------------------------------------------------------|----------|------------|--------------|
|     | 4.     | Fuel oil                                                                | t/year   | 268,575    | technosphere |
|     |        | OUTPUT                                                                  | Unit     | Amount     | IN           |
|     | 1.     | Dried sand, solids, class 0.8/0.1 mm                                    | t/year   | 107,430.00 | process B-3  |
|     | 2.     | Water in washed sand (6%)                                               | t/year   | 6857.23    | process B-4  |
|     | 3.     | Dust                                                                    | t/year   | 400        | process B-4  |
|     |        | INPUT                                                                   | Unit     | Amount     | FROM         |
|     | 1.     | Dried sand, solids, class 0.8/0.1 mm                                    | t/year   | 107,430.00 | process B-2  |
|     | 2.     | Solution HF (l), 70%–75%                                                | t/year   | 45,121     | technosphere |
|     | 2.1.   | HF (l)                                                                  | t/year   | 32,712     |              |
|     | 2.1.1. | Total fluorine                                                          | t/year   | 31,077     |              |
|     | 2.2.   | Water in acid                                                           | t/year   | 12,408     |              |
|     |        | OUTPUT                                                                  | Unit     | Amount     | IN           |
|     | 1.     | Conditioned sand, solids class 0.8/0.1mm                                | t/year   | 107,048.48 | process B-4  |
|     | 1.1.   | Dried sand, solids, class 0.8/0.1 mm                                    | t/year   | 107,030.00 |              |
| B-3 | 1.2.   | F, adsorbed on quartz grains in form of H <sub>2</sub> SiF <sub>6</sub> | t/year   | 18,478     |              |
|     | 2.     | Waste gases and fumes                                                   | t/year   | 12,825.74  | process B-4  |
|     | 2.1.   | HF (g)                                                                  | t/year   | 13,085     |              |
|     | 2.1.1. | Total fluorine                                                          | t/year   | 12,599     |              |
|     | 2.1.2. | H+ ioni                                                                 | t/year   | 0.486      |              |
|     | 2.2.   | Air                                                                     | t/year   | 12,400.08  |              |
|     | 2.3.   | Water fume                                                              | t/year   | 12,408     |              |
|     | 2.4.   | Conditioned silica dust (flour)                                         | t/year   | 400,168    |              |
|     | 2.4.1. | Silica flour                                                            | t/year   | 400        |              |
|     | 2.4.2. | F, adsorbed on quartz grains in form of H <sub>2</sub> SiF <sub>6</sub> | t/year   | 0.168      |              |
|     |        | INPUT                                                                   | Unit     | Amount     | FROM         |
|     | 1.     | Waste gases and fumes                                                   | t/year   | 12,825.74  | process B-3  |
|     | 1.1.   | HF (g)                                                                  | t/year   | 13,085     |              |
|     | 1.1.1. | Total fluorine                                                          | t/year   | 12,599     |              |
|     | 1.1.2. | H+ ioni                                                                 | t/year   | 0.486      |              |
|     | 1.2.   | Air                                                                     | t/year   | 12,400.08  |              |
|     | 1.3.   | Water fume                                                              | t/year   | 12,408     |              |
|     | 1.4.   | Conditioned silica dust (flour)                                         | t/year   | 400,168    |              |
|     | 1.4.1. | Silica flour                                                            | t/year   | 400        |              |
|     | 1.4.2. | F, adsorbed on quartz grains in form of H <sub>2</sub> SiF <sub>6</sub> | t/year   | 0.168      |              |
| B-4 | 2.     | Electricity for air supply                                              | kWh/year | 32,670.00  | technosphere |
|     |        | OUTPUT                                                                  | Unit     | Amount     | IN           |
|     | 1.     | Waste gases and fumes                                                   | t/year   | 12,825.74  | process B-5  |
|     | 1.1.   | HF (g)                                                                  | t/year   | 13,085     |              |
|     | 1.1.1. | Total fluorine                                                          | t/year   | 12,599     |              |
|     | 1.1.2. | H+ ioni                                                                 | t/year   | 0.486      |              |
|     | 1.3.   | Air                                                                     | t/year   | 12,400.08  |              |
|     | 1.4.   | Water fume                                                              | t/year   | 12,408     |              |
|     | 2.     | Conditioned silica dust (flour)                                         | t/year   | 400,168    | process B-12 |
|     | 2.1.   | Silica flour                                                            | t/year   | 400        |              |
|     | 2.2.   | F, adsorbed on quartz grains in form of H <sub>2</sub> SiF <sub>6</sub> | t/year   | 0.168      |              |
| B-5 |        | INPUT                                                                   | Unit     | Amount     | FROM         |

|     |        |                                          |          |            |              |
|-----|--------|------------------------------------------|----------|------------|--------------|
|     | 1.     | Waste gases and fumes                    | t/year   | 12,825.74  | process B-4  |
|     | 1.1.   | HF (g)                                   | t/year   | 13,085     |              |
|     | 1.1.1. | Total fluorine                           | t/year   | 12,599     |              |
|     | 1.1.2. | H+ ioni                                  | t/year   | 0.486      |              |
|     | 1.3.   | Air                                      | t/year   | 12,400.08  |              |
|     | 1.4.   | Water fume                               | t/year   | 12,408     |              |
|     | 2.     | Water (minimal)                          | t/year   | 3149.68    | technosphere |
|     | 3.     | Electricity                              | kWh/year | 32,452.20  | technosphere |
|     |        | OUTPUT                                   | Unit     | Amount     | IN           |
|     | 1.     | Water onečišćena fluorom                 | t/year   | 3175.05    | process B-6  |
|     | 1.1.   | Water                                    | t/year   | 3162.09    | process B-6  |
|     | 1.2.   | Total fluorine                           | t/year   | 12,473     | process B-6  |
|     | 1.3.   | H+ ioni                                  | t/year   | 0.486      | process B-6  |
|     | 2.     | Cleaned air                              | t/year   | 12,400.21  | nature (Air) |
|     | 1.1.   | Air                                      | t/year   | 12,400.08  | nature (Air) |
|     | 1.4.   | Fluor <1%                                | t/year   | 0.126      | nature (Air) |
|     |        | INPUT                                    | Unit     | Amount     | FROM         |
|     | 1.     | Water with stripped fluorine             | t/year   | 3175.05    | process B-5  |
|     | 1.1.   | Water                                    | t/year   | 3162.09    |              |
|     | 1.2.   | Total fluorine                           | t/year   | 12,473     |              |
|     | 1.3.   | H+ ioni                                  | t/year   | 0.486      |              |
|     | 2.     | Lime                                     | t/year   | 21,921     | technosphere |
|     | 2.1.   | Ca <sup>2+</sup> in lime                 | t/year   | 11,849     |              |
|     | 2.2.   | OH <sup>-</sup> in lime                  | t/year   | 10,072     |              |
| B-6 | 2.3.   | H+ required for neutralisation           | t/year   | 0.629      |              |
|     | 3.     | Balance H+/OH <sup>-</sup>               | t/year   | -0.143     | calculation  |
|     | 4.     | HCl for neutralisation                   | t/year   | 2,578      | technosphere |
|     | 4.1.   | H+ ions                                  | t/year   | 0.143      |              |
|     | 4.2.   | Cl <sup>-</sup> ions                     | t/year   | 2,435      |              |
|     |        | OUTPUT                                   | Unit     | Amount     | IN           |
|     | 1.     | CaF <sub>2</sub> suspension              | t/year   | 3199.55    | process B-6  |
|     | 1.1.   | CaF <sub>2</sub> suspended               | t/year   | 24,322     |              |
|     | 1.2.   | Water in suspension                      | t/year   | 3172.79    |              |
|     | 1.3.   | Cl <sup>-</sup> ions                     | t/year   | 2,435      |              |
|     |        | INPUT                                    | Unit     | Amount     | FROM         |
|     | 1.     | CaF <sub>2</sub> suspension              | t/year   | 3199.55    | process B-8  |
|     | 1.1.   | CaF <sub>2</sub> suspended               | t/year   | 24,322     |              |
|     | 1.2.   | Water in suspension                      | t/year   | 3172.79    |              |
|     | 1.3.   | Cl <sup>-</sup> ions                     | t/year   | 2,435      |              |
| B-7 | 2.     | Electricity                              | kWh/year | 7,322      | technosphere |
|     |        | OUTPUT                                   | Unit     | Amount     | IN           |
|     | 1.     | Filter cake (inert CaF <sub>2</sub> )    | t/year   | 26,757     | process B-12 |
|     | 1.1.   | CaF <sub>2</sub> in filtercake           | t/year   | 24,322     |              |
|     | 1.2.   | Water in filtercake                      | t/year   | 2,435      |              |
|     | 2.     | Water                                    | t/year   | 3170.36    | technosphere |
|     |        | INPUT                                    | Unit     | Amount     | FROM         |
|     | 1.     | Conditioned sand, solids class 0.8/0.1mm | t/year   | 107,048.48 | process B-3  |
| B-8 | 1.1.   | Dried sand, solids, class 0.8/0.1 mm     | t/year   | 107,030.00 |              |
|     | 1.1.1. | Quartz (silica), 87%                     | t/year   | 93,116.10  |              |
|     | 1.1.2. | Feldspar, 13%                            | t/year   | 13,913.90  |              |
|     | 1.2.   | F, adsorbed on quartz grains in form of  | t/year   | 18,478     |              |

|      |      |                                                 |          |           |              |
|------|------|-------------------------------------------------|----------|-----------|--------------|
|      |      | H2SiF6                                          |          |           |              |
|      | 2.   | Electricity                                     | kWh/year | 39,251.11 | technosphere |
|      |      | OUTPUT                                          | Unit     | Amount    | IN           |
|      | 1.   | Silica sand concentrate, solids class 0.8/0.1mm | t/year   | 93,940.59 | process B-9  |
|      | 1.1. | Silica, 98%                                     | t/year   | 92,045.89 |              |
|      | 1.2. | Feldspar, 2%                                    | t/year   | 1878.49   |              |
|      | 1.3. | F, adsorbiran na zrna u obliku H2SiF6           | t/year   | 16,218    |              |
|      | 2.   | Feldspar concentrate, solids class 0.8/0.1mm    | t/year   | 13,091.67 | process B-10 |
|      | 2.1. | Feldspar, 90%                                   | t/year   | 11,780.47 |              |
|      | 2.2. | Silica, 10%                                     | t/year   | 1308.94   |              |
|      | 2.3. | F, adsorbiran na zrna u obliku H2SiF6           | t/year   | 2.26      |              |
|      |      | INPUT                                           | Unit     | Amount    | FROM         |
|      | 1.   | Silica sand concentrate, solids class 0.8/0.1mm | t/year   | 93,940.59 | process B-8  |
|      | 1.1. | Silica, 98%                                     | t/year   | 92,045.89 |              |
|      | 1.2. | Feldspar, 2%                                    | t/year   | 1878.49   |              |
|      | 1.3. | F, adsorbed on quartz grains in form of H2SiF6  | t/year   | 16,218    |              |
|      | 2.   | Air for dedusting                               | t/year   | 51,000.00 | process B-8  |
|      | 3.   | Electricity                                     | kWh/year | 21,960.00 | technosphere |
| B-9  | 3.1. | Electricity (magnetic separator)                | kWh/year | 6960.00   |              |
|      | 3.2. | Electricity (elevator)                          | kWh/year | 15,000.00 |              |
|      |      | OUTPUT                                          | Unit     | Amount    | IN           |
|      | 1.   | Silica sand concentrate, solids class 0.8/0.1mm | t/year   | 93,845.71 | technosphere |
|      | 1.1. | Silica, 98%                                     | t/year   | 91,952.92 |              |
|      | 1.2. | Feldspar, 2%                                    | t/year   | 1876.59   |              |
|      | 1.3. | F, adsorbed on quartz grains in form of H2SiF6  | t/year   | 16,202    |              |
|      | 2.   | Dust                                            | t/year   | 0.939     | process B-12 |
|      | 3.   | Magnetics concentrate                           | t/year   | 93,941    | process B-11 |
|      |      | INPUT                                           | Unit     | Amount    | FROM         |
|      | 1.   | Feldspar concentrate, solids class 0.8/0.1mm    | t/year   | 13,091.67 | process B-8  |
|      | 1.1. | Feldspar, 90%                                   | t/year   | 11,780.47 |              |
|      | 1.2. | Silica, 10%                                     | t/year   | 1308.94   |              |
|      | 1.3. | F, adsorbed on quartz grains in form of H2SiF6  | t/year   | 2.26      |              |
|      | 2.   | Electricity                                     | kWh/year | 18,000.00 | technosphere |
|      | 2.1. | Electricity (magnetski separator)               | kWh/year | 3000.00   |              |
| B-10 | 2.2. | Electricity (elevator)                          | kWh/year | 15,000.00 |              |
|      |      | OUTPUT                                          | Unit     | Amount    | IN           |
|      | 1.   | Feldspar concentrate, solids class 0.8/0.1mm    | t/year   | 13,078.45 | technosphere |
|      | 1.1. | Feldspar, 90%                                   | t/year   | 11,768.57 |              |
|      | 1.2. | Silica, 10%                                     | t/year   | 1307.62   |              |
|      | 1.3. | F, adsorbed on quartz grains in form of H2SiF6  | t/year   | 2,258     |              |
|      | 2.   | Dust                                            | t/year   | 0.131     | process B-12 |
|      | 3.   | Magnetics concentrate                           | t/year   | 11.78     | process B-11 |
|      |      | INPUT                                           | Unit     | Amount    | FROM         |
|      | 1.   | Magnetics concentrate                           | t/year   | 93,941    | process B-9  |
| B-11 | 2.   | Magnetics concentrate                           | t/year   | 11.78     | process B-10 |
|      | 3.   | Electricity                                     | kWh/year | 15,000.00 | technosphere |
|      |      | OUTPUT                                          | Unit     | Amount    | IN           |

|      |      |                                         |        |         |                   |
|------|------|-----------------------------------------|--------|---------|-------------------|
|      | 1.   | Magnetični produkt                      | t/year | 105,721 | technosphere      |
|      |      | INPUT                                   | Unit   | Amount  | FROM              |
|      | 1.   | Dust                                    | t/year | 401,107 | from process B-11 |
|      | 2.   | Filter cake (inert CaF <sub>2</sub> )   | t/year | 26,757  |                   |
|      | 2.1. | CaF <sub>2</sub>                        | t/year | 24,322  |                   |
|      | 2.2. | Water                                   | t/year | 2,435   |                   |
| B-12 | 4.   | Diesel                                  | t/year | 0.6     | from technosphere |
|      |      | OUTPUT                                  | Unit   | Amount  | IN                |
|      | 1.   | Intert mineral material disposed nature | t/year | 454,621 | nature            |
|      | 1.1. | Dust                                    | t/year | 401,107 |                   |
|      | 1.2. | Filter cake (inert CaF <sub>2</sub> )   | t/year | 26,757  |                   |
|      | 1.3. | CaF <sub>2</sub>                        | t/year | 24,322  |                   |
|      | 1.4. | Water                                   | t/year | 2,435   |                   |

**Table S3. FLOTATION.**

| UNIT |      | INPUT                                 | Unit     | Amount     | FROM              |
|------|------|---------------------------------------|----------|------------|-------------------|
|      | 1.   | Washed sand, w < 6%, class 0.8/0.1 mm | t/year   | 114,287.23 | from process A-15 |
|      | 1.1. | Washed sand, solids, class 0.8/0.1 mm | t/year   | 107,430.00 |                   |
|      | 1.2. | Water in washed sand (6%)             | t/year   | 6857.23    |                   |
|      | 2.   | Water                                 | t/year   | 64,762.77  | from technosphere |
|      | 3.   | H <sub>2</sub> SO <sub>4</sub> , 98%  | t/year   | 3,581      | from technosphere |
|      | 3.1. | H <sub>2</sub> SO <sub>4</sub> , 100% | t/year   | 3,509      |                   |
| C-1  | 3.2. | H <sub>2</sub> O, 100%                | t/year   | 0.072      |                   |
|      | 4.   | Electricity                           | kWh/year | 66,000.00  | from technosphere |
|      | 4.1. | Electricity-pumpa                     | kWh/year | 44,000.00  |                   |
|      | 4.2. | Electricity-agitator                  | kWh/year | 22,000.00  |                   |
|      |      | OUTPUT                                | Unit     | Amount     | IN                |
|      | 1.   | Conditioned pulp                      | t/year   | 179,053.58 | process C-2       |
|      | 1.1. | Sand                                  | t/year   | 107,430.00 |                   |
|      | 1.2. | Water                                 | t/year   | 71,620.07  |                   |
|      | 1.3. | Acid                                  | t/year   | 3,509      |                   |
|      |      | INPUT                                 | Unit     | Amount     | FROM              |
|      | 1.   | Conditioned pulp                      | t/year   | 179,053.58 | from process C-1  |
|      | 1.1. | Sand                                  | t/year   | 107,430.00 |                   |
|      | 1.2. | Water                                 | t/year   | 71,620.07  |                   |
|      | 1.3. | Acid                                  | t/year   | 3,509      |                   |
|      | 2.   | Water                                 | t/year   | 250,669.93 | from technosphere |
| C-2  | 3.   | Tallow amine                          | t/year   | 40,286     | from technosphere |
|      | 4.   | Fuel oil                              | t/year   | 28.2       | from technosphere |
|      | 5.   | Electricity                           | kWh/year | 22,000.00  | from technosphere |
|      |      | OUTPUT                                | Unit     | Amount     | IN                |
|      | 1.   | Overflow-1                            | t/year   | 21,547.99  | process C-10      |
|      | 1.1. | Sand                                  | t/year   | 5371.50    |                   |
|      | 1.2. | Water                                 | t/year   | 16,114.50  |                   |
|      | 1.3. | Acid                                  | t/year   | 0.351      |                   |

|     |        |                                |          |            |                   |
|-----|--------|--------------------------------|----------|------------|-------------------|
|     | 1.4.   | Tallow amine                   | t/year   | 36,258     |                   |
|     | 1.5.   | Fuel oil                       | t/year   | 25,38      |                   |
|     | 2.     | Underflow-1                    | t/year   | 408,244.01 | process C-3       |
|     | 2.1.   | Sand                           | t/year   | 102,058.50 |                   |
|     | 2.2.   | Water                          | t/year   | 306,175.50 |                   |
|     | 2.3.   | Acid                           | t/year   | 3,334      |                   |
|     | 2.4.   | Tallow amine                   | t/year   | 4,029      |                   |
|     | 2.5.   | Fuel oil                       | t/year   | 2.82       |                   |
|     | 3.     | Electricity                    | kWh/year | 22,000.00  | from technosphere |
|     |        | INPUT                          | Unit     | Amount     | FROM              |
|     | 1.     | Underflow-1                    | t/year   | 408,244.01 | from process C-2  |
|     | 1.1.   | Sand                           | t/year   | 102,058.50 |                   |
|     | 1.2.   | Water with flotation reagents  | t/year   | 306,185.68 |                   |
|     | 1.2.1. | Water                          | t/year   | 306,175.50 |                   |
|     | 1.2.2. | Acid                           | t/year   | 3,334      |                   |
|     | 1.2.3. | Tallow amine                   | t/year   | 4,029      |                   |
|     | 1.2.4. | Fuel oil                       | t/year   | 2.82       |                   |
|     |        | OUTPUT                         | Unit     | Amount     | IN                |
| C-3 | 1.     | Thickened Underflow-1          | t/year   | 170,097.50 | process C-4       |
|     | 1.1.   | Sand                           | t/year   | 102,058.50 |                   |
|     | 1.2.   | Water, with flotation reagents | t/year   | 68,039.00  |                   |
|     | 1.2.1. | Water                          | t/year   | 68,036.74  |                   |
|     | 1.2.2. | Acid                           | t/year   | 0.741      |                   |
|     | 1.2.3. | Tallow amine                   | t/year   | 0.895      |                   |
|     | 1.2.4. | Fuel oil                       | t/year   | 0.627      |                   |
|     | 2.     | Water with flotation reagents  | t/year   | 238,136.50 | technosphere*     |
|     | 2.1.   | Water                          | t/year   | 238,138.76 |                   |
|     | 2.2.   | Acid                           | t/year   | 2,593      |                   |
|     | 2.3.   | Tallow amine                   | t/year   | 3,133      |                   |
|     | 2.4.   | Fuel oil                       | t/year   | 2,193      |                   |
|     |        | INPUT                          | Unit     | Amount     | FROM              |
|     | 1.     | Thickened Underflow-1          | t/year   | 170,097.50 | from process C-3  |
|     | 1.1.   | Sand                           | t/year   | 102,058.50 |                   |
|     | 1.2.   | Water, with flotation reagents | t/year   | 68,039.00  |                   |
|     | 1.3.   | Water                          | t/year   | 68,036.74  |                   |
|     | 1.4.   | Acid                           | t/year   | 0.741      |                   |
|     | 1.5.   | Tallow amine                   | t/year   | 0.895      |                   |
|     | 1.6.   | Fuel oil                       | t/year   | 2,193      |                   |
|     | 2.     | H2SO4, 98%                     | t/year   | 2,646      | from technosphere |
| C-4 | 2.1.   | H2SO4, 100%                    | t/year   | 2,593      |                   |
|     | 2.2.   | H2O, 100%                      | t/year   | 0.053      |                   |
|     | 3.     | Electricity                    | kWh/year | 22,000.00  | from technosphere |
|     |        | OUTPUT                         | Unit     | Amount     | IN                |
|     | 1.     | Thickened Underflow-1          | t/year   | 170,099.52 | process C-5       |
|     | 1.1.   | Sand                           | t/year   | 102,058.50 |                   |
|     | 1.2.   | Water, with flotation reagents | t/year   | 68,041.02  |                   |
|     | 1.2.1. | Water                          | t/year   | 68,036.79  |                   |
|     | 1.2.2. | Acid                           | t/year   | 3,334      |                   |
|     | 1.2.3. | Tallow amine                   | t/year   | 0.895      |                   |
|     | 1.2.4. | Fuel oil                       | t/year   | 2,193      |                   |
|     |        | INPUT                          | Unit     | Amount     | FROM              |
| C-5 | 1.     | Thickened Underflow-1          | t/year   | 170,099.52 | from process C-4  |



|     |        |                                |          |            |                   |
|-----|--------|--------------------------------|----------|------------|-------------------|
|     | 1.1.   | Sand                           | t/year   | 102,058.50 |                   |
|     | 1.2.   | Water, with flotation reagents | t/year   | 68,041.02  |                   |
|     | 1.2.1. | Water                          | t/year   | 68,036.79  |                   |
|     | 1.2.2. | Acid                           | t/year   | 3,334      |                   |
|     | 1.2.3. | Tallow amine                   | t/year   | 0.895      |                   |
|     | 1.2.4. | Fuel oil                       | t/year   | 2,193      |                   |
|     | 2.     | Water                          | t/year   | 238,134.48 | from technosphere |
|     | 3.     | Anionic collector Aero 855     | t/year   | 26.79      | from technosphere |
|     | 4.     | Electricity                    | kWh/year | 22,000.00  | from technosphere |
|     |        | OUTPUT                         | Unit     | Amount     | IN                |
|     | 1.     | Overflow-2                     | t/year   | 40,847.73  | PROCESS C-11      |
|     | 1.1.   | Sand                           | t/year   | 10,205.85  |                   |
|     | 1.2.   | Water, with flotation reagents | t/year   | 30,641.88  |                   |
|     | 1.2.1. | Water                          | t/year   | 30,617.13  |                   |
|     | 1.2.2. | Acid                           | t/year   | 0.333      |                   |
|     | 1.2.3. | Tallow aminee                  | t/year   | 0.09       |                   |
|     | 1.2.4. | Anionic collector Aero 855     | t/year   | 24,111     |                   |
|     | 1.2.5. | Fuel oil                       | t/year   | 0.219      |                   |
|     | 2.     | Underflow-2                    | t/year   | 642,975.66 | process C-6       |
|     | 2.1.   | Sand                           | t/year   | 91,852.65  |                   |
|     | 2.2.   | Water, with flotation reagents | t/year   | 275,560.41 |                   |
|     | 2.2.1. | Water                          | t/year   | 275,554.14 |                   |
|     | 2.2.2. | Acid                           | t/year   | 3          |                   |
|     | 2.2.3. | Tallow amine                   | t/year   | 0.806      |                   |
|     | 2.2.4. | Anionic collector Aero 855     | t/year   | 2,679      |                   |
|     | 2.2.5. | Fuel oil                       | t/year   | 1,974      |                   |
|     |        | INPUT                          | Unit     | Amount     | FROM              |
|     | 1.     | Underflow-2                    | t/year   | 642,975.66 | from process C-5  |
|     | 1.1.   | Sand                           | t/year   | 91,852.65  |                   |
|     | 1.2.   | Water, with flotation reagents | t/year   | 275,560.41 |                   |
|     | 1.2.1. | Water                          | t/year   | 275,554.14 |                   |
|     | 1.2.2. | Acid                           | t/year   | 3          |                   |
|     | 1.2.3. | Tallow amine                   | t/year   | 0.806      |                   |
|     | 1.2.4. | Anionic collector Aero 855     | t/year   | 2,679      |                   |
|     | 1.2.5. | Fuel oil                       | t/year   | 1,974      |                   |
|     |        | OUTPUT                         | Unit     | Amount     | IN                |
|     | 1.     | Thickened Underflow-2          | t/year   | 153,087.75 | process C-7       |
| C-6 | 1.1.   | Sand                           | t/year   | 91,852.65  |                   |
|     | 1.2.   | Water, with flotation reagents | t/year   | 61,235.10  |                   |
|     | 1.3.   | Water                          | t/year   | 61,233.71  |                   |
|     | 1.4.   | Acid                           | t/year   | 0.667      |                   |
|     | 1.5.   | Tallow amine                   | t/year   | 0.179      |                   |
|     | 1.6.   | Anionic collector Aero 855     | t/year   | 0.595      |                   |
|     | 1.7.   | Fuel oil                       | t/year   | 0.439      |                   |
|     | 2.     | Water with flotation reagents  | t/year   | 214,325.31 | technosphere*     |
|     | 2.1.   | Water                          | t/year   | 214,320.44 |                   |
|     | 2.2.   | Acid                           | t/year   | 2,334      |                   |
|     | 2.3.   | Tallow amine                   | t/year   | 0.627      |                   |
|     | 2.4.   | Anionic collector Aero 855     | t/year   | 2,084      |                   |
|     | 2.5.   | Fuel oil                       | t/year   | 1,535      |                   |
|     |        | INPUT                          | Unit     | Amount     | FROM              |
| C-7 | 1.     | Thickened Underflow-2          | t/year   | 153,087.75 | from process C-6  |
|     | 1.1.   | Sand                           | t/year   | 91,852.65  |                   |

|     |        |                                |          |            |                   |
|-----|--------|--------------------------------|----------|------------|-------------------|
|     | 1.2.   | Water, with flotation reagents | t/year   | 61,235.10  |                   |
|     | 1.3.   | Water                          | t/year   | 61,233.71  |                   |
|     | 1.4.   | Acid                           | t/year   | 0.667      |                   |
|     | 1.5.   | Tallow amine                   | t/year   | 0.179      |                   |
|     | 1.6.   | Anionic collector Aero 855     | t/year   | 0.595      |                   |
|     | 1.7.   | Fuel oil                       | t/year   | 0.439      |                   |
|     | 2.     | H2SO4, 98%                     | t/year   | 2,381      | from technosphere |
|     | 2.1.   | H2SO4, 100%                    | t/year   | 2,334      |                   |
|     | 2.2.   | H2O, 100%                      | t/year   | 0.048      |                   |
|     | 3.     | Electricity                    | kWh/year | 22,000.00  | from technosphere |
|     |        | OUTPUT                         | Unit     | Amount     | IN                |
|     | 1.     | Thickened Underflow-2          | t/year   | 153,090.62 | process C-8       |
|     | 1.1.   | Sand                           | t/year   | 91,852.65  |                   |
|     | 1.2.   | Water, with flotation reagents | t/year   | 61,237.97  |                   |
|     | 1.2.1. | Water                          | t/year   | 61,233.76  |                   |
|     | 1.2.2. | Acid                           | t/year   | 3          |                   |
|     | 1.2.3. | Tallow amine                   | t/year   | 0.179      |                   |
|     | 1.2.4. | Anionic collector Aero 855     | t/year   | 0.595      |                   |
|     | 1.2.5. | Fuel oil                       | t/year   | 0.439      |                   |
|     |        | INPUT                          | Unit     | Amount     | FROM              |
|     | 1.     | Thickened Underflow-2          | t/year   | 153,090.62 | from process C-7  |
|     | 1.1.   | Sand                           | t/year   | 91,852.65  |                   |
|     | 1.2.   | Water, with flotation reagents | t/year   | 61,237.97  |                   |
|     | 1.2.1. | Water                          | t/year   | 61,233.76  |                   |
|     | 1.2.2. | Acid                           | t/year   | 3          |                   |
|     | 1.2.3. | Tallow amine                   | t/year   | 0.179      |                   |
|     | 1.2.4. | Anionic collector Aero 855     | t/year   | 0.595      |                   |
|     | 1.2.5. | Fuel oil                       | t/year   | 0.439      |                   |
|     | 2.     | Water                          | t/year   | 214,319.98 | from technosphere |
|     | 3.     | HF,70%                         | t/year   | 75.45      | from technosphere |
|     | 3.1.   | HF,100%                        | t/year   | 52,815     |                   |
|     | 3.2.   | H2O                            | t/year   | 22,635     |                   |
|     | 4.     | Fuel oil                       | t/year   | 23,673     | from technosphere |
| C-8 | 5.     | Electricity                    | kWh/year | 22,000.00  | from technosphere |
|     |        | OUTPUT                         | Unit     | Amount     | IN                |
|     | 1.     | Overflow-3                     | t/year   | 73,505.85  | PROCESS C-12      |
|     | 1.1.   | Sand                           | t/year   | 18,370.53  |                   |
|     | 1.2.   | Water, with flotation reagents | t/year   | 55,135.32  |                   |
|     | 1.2.1. | Water                          | t/year   | 55,115.27  |                   |
|     | 1.2.2. | Acid                           | t/year   | 0.6        |                   |
|     | 1.2.3. | Tallow amine                   | t/year   | 0.036      |                   |
|     | 1.2.4. | Anionic collector Aero 855     | t/year   | 0.119      |                   |
|     | 1.2.5. | Fuel oil                       | t/year   | 19,289     |                   |
|     | 2.     | Underflow                      | t/year   | 293,951.06 | process C-9       |
|     | 2.1.   | Sand                           | t/year   | 73,482.12  |                   |
|     | 2.2.   | Water, with flotation reagents | t/year   | 220,468.94 |                   |
|     | 2.2.1. | Water                          | t/year   | 220,461,10 |                   |
|     | 2.2.2. | Acid                           | t/year   | 2.4        |                   |
|     | 2.2.3. | Tallow amine                   | t/year   | 0.143      |                   |
|     | 2.2.4. | Anionic collector Aero 855     | t/year   | 0.476      |                   |
|     | 2.2.5. | Fuel oil                       | t/year   | 4,822      |                   |

|      |        | INPUT                          | Unit   | Amount     | FROM             |
|------|--------|--------------------------------|--------|------------|------------------|
|      | 1.     | Underflow-3                    | t/year | 293,951.06 | from process C-8 |
|      | 1.1.   | Sand                           | t/year | 73,482.12  |                  |
|      | 1.2.   | Water, with flotation reagents | t/year | 220,468.94 |                  |
|      | 1.2.1. | Water                          | t/year | 220,461.10 |                  |
|      | 1.2.2. | Acid                           | t/year | 2.4        |                  |
|      | 1.2.3. | Tallow amine                   | t/year | 0.143      |                  |
|      | 1.2.4. | Anionic collector Aero 855     | t/year | 0.476      |                  |
|      | 1.2.5. | Fuel oil                       | t/year | 4,822      |                  |
|      |        | OUTPUT                         | Unit   | Amount     | IN               |
|      | 1.     | Thickened Underflow-3          | t/year | 122,470.20 | process C-13     |
| C-9  | 1.1.   | Sand                           | t/year | 73,482.12  |                  |
|      | 1.2.   | Water, with flotation reagents | t/year | 48,988.08  |                  |
|      | 1.2.1. | Water                          | t/year | 48,986.34  |                  |
|      | 1.2.2. | Acid                           | t/year | 0.533      |                  |
|      | 1.2.3. | Tallow amine                   | t/year | 0.032      |                  |
|      | 1.2.4. | Anionic collector Aero 855     | t/year | 0.106      |                  |
|      | 1.2.5. | Fuel oil                       | t/year | 1,072      |                  |
|      | 2.     | Water with flotation reagents  | t/year | 171,480.86 | process C-12     |
|      | 2.1.   | Water                          | t/year | 171,474.76 |                  |
|      | 2.2.   | Acid                           | t/year | 1,867      |                  |
|      | 2.3.   | Tallow amine                   | t/year | 0.111      |                  |
|      | 2.4.   | Anionic collector Aero 855     | t/year | 0.37       |                  |
|      | 2.5.   | Fuel oil                       | t/year | 3,751      |                  |
|      |        | INPUT                          | Unit   | Amount     | FROM             |
|      | 1.     | Overflow-1                     | t/year | 21,547.99  | from process C-2 |
|      | 1.1.   | Sand                           | t/year | 5371.50    |                  |
|      | 1.2.   | Water with flotation reagents  | t/year | 16,176.49  |                  |
|      | 1.2.1. | Water                          | t/year | 16,114.50  |                  |
|      | 1.2.2. | Acid                           | t/year | 0.351      |                  |
|      | 1.2.3. | Tallow amine                   | t/year | 36,258     |                  |
|      | 1.2.4. | Fuel oil                       | t/year | 25.38      |                  |
|      |        | OUTPUT                         | Unit   | Amount     | IN               |
|      | 1.     | Thickened Overflow-1           | t/year | 8952.50    | process C-14     |
| C-10 | 1.1.   | Sand                           | t/year | 5371.50    |                  |
|      | 1.2.   | Water, with flotation reagents | t/year | 3581.00    |                  |
|      | 1.2.1. | Water                          | t/year | 3567.28    |                  |
|      | 1.2.2. | Acid                           | t/year | 0.078      |                  |
|      | 1.2.3. | Tallow amine                   | t/year | 8,026      |                  |
|      | 1.2.4. | Fuel oil                       | t/year | 5,618      |                  |
|      | 2.     | Water with flotation reagents  | t/year | 12,595.49  | process C-15     |
|      | 2.1.   | Water                          | t/year | 12,547.22  |                  |
|      | 2.2.   | Acid                           | t/year | 0.273      |                  |
|      | 2.3.   | Tallow amine                   | t/year | 28,231     |                  |
|      | 2.5.   | Fuel oil                       | t/year | 19,762     |                  |
|      |        | INPUT                          | Unit   | Amount     | FROM             |
|      | 1.     | Overflow-2                     | t/year | 40,847.73  | from process C-5 |
|      | 1.1.   | Sand                           | t/year | 10,205.85  |                  |
|      | 1.2.   | Water, with flotation reagents | t/year | 30,641.88  |                  |
| C-11 | 1.2.1. | Water                          | t/year | 30,617.13  |                  |
|      | 1.2.2. | Acid                           | t/year | 0.333      |                  |
|      | 1.2.3. | Tallow amine                   | t/year | 0.09       |                  |
|      | 1.2.4. | Anionic collector Aero 855     | t/year | 24,111     |                  |
|      | 1.2.5. | Fuel oil                       | t/year | 0.219      |                  |
|      |        | OUTPUT                         | Unit   | Amount     | IN               |

|      |        |                                  |        |            |                  |
|------|--------|----------------------------------|--------|------------|------------------|
|      | 1.     | Thickened Overflow-2             | t/year | 17,009.75  | process C-14     |
|      | 1.1.   | Sand                             | t/year | 10,205.85  |                  |
|      | 1.2.   | Water, with flotation reagents   | t/year | 6803.90    |                  |
|      | 1.2.1. | Water                            | t/year | 6798.40    |                  |
|      | 1.2.2. | Acid                             | t/year | 0.074      |                  |
|      | 1.2.3. | Tallow amine                     | t/year | 0.02       |                  |
|      | 1.2.4. | Anionic collector Aero 855       | t/year | 5,354      |                  |
|      | 1.2.5. | Fuel oil                         | t/year | 0.049      |                  |
|      | 2.     | Water, with flotation reagents   | t/year | 23,837.98  | process C-15     |
|      | 2.1.   | Water                            | t/year | 23,818.72  |                  |
|      | 2.2.   | Acid                             | t/year | 0.259      |                  |
|      | 2.3.   | Tallow amine                     | t/year | 0.07       |                  |
|      | 2.4.   | Anionic collector Aero 855       | t/year | 18,758     |                  |
|      | 2.5.   | Fuel oil                         | t/year | 0.171      |                  |
|      |        | INPUT                            | Unit   | Amount     | FROM             |
|      | 1.     | Overflow-3                       | t/year | 73,505.85  | from process C-8 |
|      | 1.1.   | Sand                             | t/year | 18,370.53  |                  |
|      | 1.2.   | Water, with flotation reagents   | t/year | 55,135.32  |                  |
|      | 1.2.1. | Water                            | t/year | 55,115.27  |                  |
|      | 1.2.2. | Acid                             | t/year | 0.6        |                  |
|      | 1.2.3. | Tallow amine                     | t/year | 0.036      |                  |
|      | 1.2.4. | Anionic collector Aero 855       | t/year | 0.119      |                  |
|      | 1.2.5. | Fuel oil                         | t/year | 19,289     |                  |
|      |        | OUTPUT                           | Unit   | Amount     | IN               |
| C-12 | 1.     | Thickened Overflow-3             | t/year | 30,617.55  | process C-14     |
|      | 1.1.   | Sand                             | t/year | 18,370.53  |                  |
|      | 1.2.   | Water, with flotation reagents   | t/year | 12,247.02  |                  |
|      | 1.2.1. | Water                            | t/year | 12,242.57  |                  |
|      | 1.2.2. | Acid                             | t/year | 0.133      |                  |
|      | 1.2.3. | Tallow amine                     | t/year | 0.008      |                  |
|      | 1.2.4. | Anionic collector Aero 855       | t/year | 0.026      |                  |
|      | 1.2.5. | Fuel oil                         | t/year | 4,285      |                  |
|      | 2.     | Water, with flotation reagents   | t/year | 42,888.30  | process C-15     |
|      | 2.1.   | Water                            | t/year | 42,872.71  |                  |
|      | 2.2.   | Acid                             | t/year | 0.467      |                  |
|      | 2.3.   | Tallow amine                     | t/year | 0.028      |                  |
|      | 2.4.   | Anionic collector Aero 855       | t/year | 0.093      |                  |
|      | 2.5.   | Fuel oil                         | t/year | 15,004     |                  |
|      |        | INPUT                            | Unit   | Amount     | FROM             |
| C-13 | 1.     | Thickened Underflow-3            | t/year | 122,470.20 | from process C-8 |
|      | 1.1.   | Sand                             | t/year | 73,482.12  |                  |
|      | 1.2.   | Water, with flotation reagents   | t/year | 48,988.08  |                  |
|      | 1.2.1. | Water                            | t/year | 48,986.34  |                  |
|      | 1.2.2. | Acid                             | t/year | 0.533      |                  |
|      | 1.2.3. | Tallow amine                     | t/year | 0.032      |                  |
|      | 1.2.4. | Anionic collector Aero 855       | t/year | 0.106      |                  |
|      | 1.2.5. | Fuel oil                         | t/year | 1,072      |                  |
|      |        | OUTPUT                           | Unit   | Amount     | IN               |
|      | 1.     | Glass grade silica sand, w < 10% | t/year | 81,646.80  | technosphere     |
|      | 1.1.   | Sand                             | t/year | 73,482.12  |                  |
|      | 1.2.   | Water, with flotation reagents   | t/year | 8164.68    |                  |
|      | 1.2.1. | Water                            | t/year | 4898.63    |                  |
|      | 1.2.2. | Acid                             | t/year | 0.053      |                  |
|      | 1.2.3. | Tallow amine                     | t/year | 0.003      |                  |
|      | 1.2.4. | Anionic collector Aero 855       | t/year | 0.011      |                  |
|      | 1.2.5. | Fuel oil                         | t/year | 0.107      |                  |

|      |        |                                     |        |           |                   |
|------|--------|-------------------------------------|--------|-----------|-------------------|
| C-14 | 2.     | Water, with flotation reagents      | t/year | 44,089.27 | process C-15      |
|      | 2.1.   | Water                               | t/year | 44,087.70 |                   |
|      | 2.2.   | Acid                                | t/year | 0.48      |                   |
|      | 2.3.   | Tallow amine                        | t/year | 0.029     |                   |
|      | 2.4.   | Anionic collector Aero 855          | t/year | 0.095     |                   |
|      | 2.5.   | Fuel oil                            | t/year | 0.964     |                   |
|      |        | INPUT                               | Unit   | Amount    | FROM              |
|      | 1.     | Thickened Overflow-1                | t/year | 8952.50   | from process C-10 |
|      | 1.1.   | Sand                                | t/year | 5371.50   |                   |
|      | 1.2.   | Water, with flotation reagents      | t/year | 3581.00   |                   |
|      | 1.2.1. | Water                               | t/year | 3567.28   |                   |
|      | 1.2.2. | Acid                                | t/year | 0.078     |                   |
|      | 1.2.3. | Tallow amine                        | t/year | 8,026     |                   |
|      | 1.2.4. | Fuel oil                            | t/year | 5,618     |                   |
|      | 2.     | Thickened Overflow-2                | t/year | 17,009.75 | from process C-11 |
|      | 2.1.   | Sand                                | t/year | 10,205.85 |                   |
|      | 2.2.   | Water, with flotation reagents      | t/year | 6803.90   |                   |
|      | 2.2.1. | Water                               | t/year | 6798.40   |                   |
|      | 2.2.2. | Acid                                | t/year | 0.074     |                   |
|      | 2.2.3. | Tallow amine                        | t/year | 0.02      |                   |
|      | 2.2.4. | Anionic collector Aero 855          | t/year | 5,354     |                   |
|      | 2.2.5. | Fuel oil                            | t/year | 0.049     |                   |
|      | 3.     | Thickened Overflow-3                | t/year | 30,617.55 | from process C-12 |
|      | 3.1.   | Sand                                | t/year | 18,370.53 |                   |
|      | 3.2.   | Water, with flotation reagents      | t/year | 12,247.02 |                   |
|      | 3.2.1. | Water                               | t/year | 12,242.57 |                   |
|      | 3.2.2. | Acid                                | t/year | 0.133     |                   |
|      | 3.2.3. | Tallow amine                        | t/year | 0.008     |                   |
|      | 3.2.4. | Anionic collector Aero 855          | t/year | 0,026     |                   |
|      | 3.2.5. | Fuel oil                            | t/year | 4,285     |                   |
|      |        | OUTPUT                              | Unit   | Amount    | IN                |
|      | 1.     | Muscovite concentrate, w < 10%      | t/year | 6087.70   | technosphere      |
|      | 1.1.   | Sand                                | t/year | 5371.50   |                   |
|      | 1.2.   | Water, with flotation reagents      | t/year | 358.1     |                   |
|      | 1.2.1. | Water                               | t/year | 356,728   |                   |
|      | 1.2.2. | Acid                                | t/year | 0.008     |                   |
|      | 1.2.3. | Tallow amine                        | t/year | 0.803     |                   |
|      | 1.2.4. | Fuel oil                            | t/year | 0.562     |                   |
|      | 2.     | Heavy minerals concentrate, w < 10% | t/year | 11,566.63 | technosphere      |
|      | 2.1.   | Sand                                | t/year | 10,205.85 |                   |
|      | 2.2.   | Water, with flotation reagents      | t/year | 680.39    |                   |
|      | 2.2.1. | Water                               | t/year | 679.84    |                   |
|      | 2.2.2. | Acid                                | t/year | 0.007     |                   |
|      | 2.2.3. | Tallow amine                        | t/year | 0.002     |                   |
|      | 2.2.4. | Anionic collector Aero 855          | t/year | 0.535     |                   |
|      | 2.2.5. | Fuel oil                            | t/year | 0.005     |                   |
|      | 3.     | Feldspar concentrate, w < 10%       | t/year | 20,819.93 | technosphere      |
|      | 3.1.   | Sand                                | t/year | 18,370.53 |                   |
|      | 3.2.   | Water, with flotation reagents      | t/year | 1224.70   |                   |
|      | 3.2.1. | Water                               | t/year | 1224.26   |                   |
|      | 3.2.2. | Acid                                | t/year | 0.013     |                   |
|      | 3.2.3. | Tallow amine                        | t/year | 0.001     |                   |
|      | 3.2.4. | Anionic collector Aero 855          | t/year | 0.003     |                   |
|      | 3.2.5. | Fuel oil                            | t/year | 0.428     |                   |
|      | 4.     | Water with flotation reagents       | t/year | 20,368.73 | process C-15      |

|      |      |                                |        |            |                 |
|------|------|--------------------------------|--------|------------|-----------------|
|      | 4.1. | Water                          | t/year | 20,347.42  |                 |
|      | 4.2. | Acid                           | t/year | 0.257      |                 |
|      | 4.3. | Tallow amine                   | t/year | 7,249      |                 |
|      | 4.4. | Fuel oil                       | t/year | 8,957      |                 |
|      | 4.5. | Anionic collector Aero 855     | t/year | 4,842      |                 |
|      |      | INPUT                          | Unit   | Amount     | FROM            |
|      | 1.   | Water with flotation reagents  | t/year | 12,595.49  | from process 10 |
|      |      | Water                          | t/year | 12,547.22  |                 |
|      |      | Acid                           | t/year | 0.273      |                 |
|      |      | Tallow amine                   | t/year | 28,231     |                 |
|      |      | Fuel oil                       | t/year | 19,762     |                 |
|      | 2.   | Water, with flotation reagents | t/year | 23,837.98  | from process 11 |
|      |      | Water                          | t/year | 23,818.72  |                 |
|      |      | Acid                           | t/year | 0.259      |                 |
|      |      | Tallow amine                   | t/year | 0.07       |                 |
|      |      | Anionic collector Aero 855     | t/year | 18,758     |                 |
|      |      | Fuel oil                       | t/year | 0.171      |                 |
|      | 3.   | Water, with flotation reagents | t/year | 42,888.30  | from process 12 |
|      |      | Water                          | t/year | 42,872.71  |                 |
|      |      | Acid                           | t/year | 0.467      |                 |
|      |      | Tallow amine                   | t/year | 0.028      |                 |
|      |      | Anionic collector Aero 855     | t/year | 0.093      |                 |
|      |      | Fuel oil                       | t/year | 15,004     |                 |
| c-15 | 4.   | Water, with flotation reagents | t/year | 44,089.27  | from process 13 |
|      |      | Water                          | t/year | 44,087.70  |                 |
|      |      | Acid                           | t/year | 0.48       |                 |
|      |      | Tallow amine                   | t/year | 0.029      |                 |
|      |      | Anionic collector Aero 855     | t/year | 0.095      |                 |
|      |      | Fuel oil                       | t/year | 0.964      |                 |
|      | 5.   | Water with flotation reagents  | t/year | 20,368.73  | from process 14 |
|      |      | Water                          | t/year | 20,347.42  |                 |
|      |      | Acid                           | t/year | 0.257      |                 |
|      |      | Tallow amine                   | t/year | 7,249      |                 |
|      |      | Fuel oil                       | t/year | 8,957      |                 |
|      |      | Anionic collector Aero 855     | t/year | 4,842      |                 |
|      |      | OUTPUT                         | Unit   | Amount     | IN              |
|      | 1.   | Acidic water                   | t/year | 143,779.77 | technosphere*   |
|      | 1.1. | Water                          | t/year | 143,673.78 |                 |
|      | 1.2. | Acid                           | t/year | 1,736      |                 |
|      | 2.   | Hydrocarbons                   | t/year | 104,252    | technosphere*   |
|      | 2.1. | Tallow amine                   | t/year | 35,606     |                 |
|      | 2.2. | Fuel oil                       | t/year | 44,858     |                 |
|      | 2.3. | Anionic collector Aero 855     | t/year | 23,788     |                 |

**Table S4. GRAVITY CONCENTRATION.**

| UNIT |      | INPUT                           | Unit     | Amount     | FROM              |
|------|------|---------------------------------|----------|------------|-------------------|
| D-1  | 1.   | Sized attrited sand             | t/year   | 134,287.50 | from process A-14 |
|      | 1.1. | Sand 0.8/0.1 mm                 | t/year   | 107,430.00 |                   |
|      | 1.2. | Water                           | t/year   | 26,857.50  |                   |
|      | 2.   | Water                           | t/year   | 223,812.50 | FROM prirode      |
|      | 3.   | Electricity                     | kWh/year | 15,400.00  | from technosphere |
|      |      | OUTPUT                          | Unit     | Amount     | IN                |
|      | 1.   | Heavy minerals (10%)            | t/year   | 35,810.00  | process D-3       |
|      | 1.1. | Sand 0.8/0.1 mm                 | t/year   | 10,743.00  |                   |
|      | 1.2. | Water                           | t/year   | 25,067.00  |                   |
|      | 2.   | Silica and light minerals (90%) | t/year   | 322,290.00 | process D-2       |
|      | 2.1. | Sand 0.8/0.1 mm                 | t/year   | 96,687.00  |                   |
|      | 2.2. | Water                           | t/year   | 225,603.00 |                   |
|      |      | INPUT                           | Unit     | Amount     | FROM              |
|      | 1.   | Silica and light minerals       | t/year   | 322,290.00 | from process D-1  |
| D-2  | 1.1. | Sand 0.8/0.1 mm                 | t/year   | 96,687.00  |                   |
|      | 1.2. | Water                           | t/year   | 225,603.00 |                   |
|      | 2.   | Electricity                     | kWh/year | 15,400.00  | from technosphere |
|      |      | OUTPUT                          | Unit     | Amount     | IN                |
|      | 1.   | Glass grade silica sand (85%)   | t/year   | 273,946.50 | process D-3       |
|      | 1.1. | Sand 0.8/0.1 mm                 | t/year   | 82,183.95  |                   |
|      | 1.2. | Water                           | t/year   | 191,762.55 |                   |
|      | 2.   | Feldspar (15%)                  | t/year   | 48,343.50  | process D-3       |
|      | 2.1. | Sand 0.8/0.1 mm                 | t/year   | 14,503.05  |                   |
|      | 2.2. | Water                           | t/year   | 33,840.45  |                   |
|      |      | INPUT                           | Unit     | Amount     | FROM              |
|      | 1.   | Heavy minerals                  | t/year   | 35,810.00  | from process D-1  |
|      | 1.1. | Sand 0.8/0.1 mm                 | t/year   | 10,743.00  |                   |
|      | 1.2. | Water                           | t/year   | 25,067.00  |                   |
| D-3  | 2.   | Glass grade silica sand         | t/year   | 273,946.50 | from process D-2  |
|      | 2.1. | Sand 0.8/0.1 mm                 | t/year   | 82,183.95  |                   |
|      | 2.2. | Water                           | t/year   | 191,762.55 |                   |
|      | 3.   | Feldspar (15%)                  | t/year   | 48,343.50  | from process D-2  |
|      | 3.1. | Sand 0.8/0.1 mm                 | t/year   | 14,503.05  |                   |
|      | 3.2. | Water                           | t/year   | 33,840.45  |                   |
|      | 4.   | Electricity (x3)                | kWh/year | 30,200.00  | from technosphere |
|      |      | OUTPUT                          | Unit     | Amount     | IN                |
|      | 1.   | Heavy minerals                  | t/year   | 17,905.00  | process D-4       |
|      | 1.1. | Sand 0.8/0.1 mm                 | t/year   | 10,743.00  |                   |
|      | 1.2. | Water                           | t/year   | 7162.00    |                   |
|      | 2.   | Glass grade silica sand         | t/year   | 91,315.50  | process D-4       |
|      | 2.1. | Sand 0.8/0.1 mm                 | t/year   | 82,183.95  |                   |
|      | 2.2. | Water                           | t/year   | 9131.55    |                   |
|      | 3.   | Feldspar (15%)                  | t/year   | 16,114.50  | process D-4       |
|      | 3.1. | Sand 0.8/0.1 mm                 | t/year   | 14,503.05  |                   |
|      | 3.2. | Water                           | t/year   | 1611.45    |                   |
|      | 4.   | Water                           | t/year   | 232,765.00 | nature            |
|      |      | INPUT                           | Unit     | Amount     | FROM              |
|      | 1.   | Heavy minerals                  | t/year   | 17,905.00  | from process D-3  |
| D-4  | 1.1. | Sand 0.8/0.1 mm                 | t/year   | 10,743.00  |                   |
|      | 1.2. | Water                           | t/year   | 7162,00    |                   |
|      | 2.   | Glass grade silica sand         | t/year   | 91,315.50  | from process D-3  |
|      | 2.1. | Sand 0.8/0.1 mm                 | t/year   | 82,183.95  |                   |

|      |                               |          |           |                   |
|------|-------------------------------|----------|-----------|-------------------|
| 2.2. | Water                         | t/year   | 9131.55   |                   |
| 3.   | Feldspar (15%)                | t/year   | 16,114.50 | from process D-3  |
| 3.1. | Sand 0.8/0.1 mm               | t/year   | 14,503.05 |                   |
| 3.2. | Water                         | t/year   | 1611.45   |                   |
| 4.   | Electricity for conveyor belt | kWh/year | 20,000.00 | from technosphere |
|      | OUTPUT                        | Unit     | Amount    | IN                |
| 1.   | Heavy minerals                | t/year   | 11,459.20 | technosphere      |
| 1.1. | Sand 0.8/0.1 mm               | t/year   | 10,743.00 |                   |
| 1.2. | Water                         | t/year   | 716.2     |                   |
| 2.   | Glass grade silica sand       | t/year   | 83,097.11 | technosphere      |
| 2.1. | Sand 0.8/0.1 mm               | t/year   | 82,183.95 |                   |
| 2.2. | Water                         | t/year   | 913,155   |                   |
| 3.   | Feldspar (15%)                | t/year   | 14,664.20 | technosphere      |
| 3.1. | Sand 0.8/0.1 mm               | t/year   | 14,503.05 |                   |
| 3.2. | Water                         | t/year   | 161,145   |                   |
| 4.   | Water                         | t/year   | 16,114.50 | nature            |
